# Supplementary material
Source: Elsevier journal article supplement (https://www.sciencedirect.com/science/article/pii/S1699258X13002027)
Supplement: mmc1 [file S1699258X13002027:mmc1.doc]

**Material complementario**

**Estrategia de búsqueda en Medline.**

| **#** | **Términos de búsqueda** | **Citas** |
| --- | --- | --- |
| [**#8**](http://www.ncbi.nlm.nih.gov/pubmed/advanced) | Search #1 AND #3 AND #4 Limits: Humans, English, French, Spanish | [125](http://www.ncbi.nlm.nih.gov/pubmed/?cmd=HistorySearch&querykey=26) |
| [**#7**](http://www.ncbi.nlm.nih.gov/pubmed/advanced) | Search #1 AND #3 AND #4 | [146](http://www.ncbi.nlm.nih.gov/pubmed/?cmd=HistorySearch&querykey=24) |
| [**#6**](http://www.ncbi.nlm.nih.gov/pubmed/advanced) | Search #1 AND #2 AND #4 Limits: Humans, English, French, Spanish | [538](http://www.ncbi.nlm.nih.gov/pubmed/?cmd=HistorySearch&querykey=25) |
| [**#5**](http://www.ncbi.nlm.nih.gov/pubmed/advanced) | Search #1 AND #2 AND #4 | [660](http://www.ncbi.nlm.nih.gov/pubmed/?cmd=HistorySearch&querykey=23) |
| [**#4**](http://www.ncbi.nlm.nih.gov/pubmed/advanced) | Search (((((((((((((("Review"[Publication Type] OR Review, Systematic OR Review, Multicase OR Review Literature OR Review, Academic OR Review of Reported Cases OR Review)) OR ((("Clinical Trial"[Publication Type]) OR "Validation Studies"[Publication Type]) OR "Evaluation Studies"[Publication Type])) OR ("Clinical Trial, Phase I"[Publication Type] OR Clinical Trial, Phase 1)) OR ("Clinical Trial, Phase II"[Publication Type] OR Clinical Trial, Phase 2 OR Clinical Trial, Phase II)) OR ("Clinical Trial, Phase III"[Publication Type] OR Clinical Trial, Phase 3 OR Clinical Trial, Phase III)) OR ("Clinical Trial, Phase IV"[Publication Type] OR Clinical Trial, Phase 4 OR Clinical Trial, Phase IV)) OR ("Controlled Clinical Trial"[Publication Type])) OR ("Multicenter Study"[Publication Type] OR Multicenter Studies OR Multicenter Study)) OR ("Randomized Controlled Trial"[Publication Type] OR Randomized Controlled Trial)) OR ("Cohort Studies"[Mesh] OR Cohort Study OR Studies, Cohort OR Study, Cohort OR Concurrent Studies OR Studies, Concurrent OR Concurrent Study OR Study, Concurrent OR Historical Cohort Studies OR Studies, Historical Cohort OR Cohort Studies, Historical OR Cohort Study, Historical OR Historical Cohort Study OR Study, Historical Cohort OR Analysis, Cohort OR Analyses, Cohort OR Cohort Analyses OR Cohort Analysis OR Closed Cohort Studies OR Cohort Studies, Closed OR Closed Cohort Study OR Cohort Study, Closed OR Study, Closed Cohort OR Studies, Closed Cohort OR Incidence Studies OR Incidence Study OR Studies, Incidence OR Study, Incidence OR Cohort Studies)) OR ("Cohort Studies"[Mesh] OR cohort study OR studies, cohort OR study, cohort OR concurrent studies OR studies, concurrent OR concurrent study OR study, concurrent OR historical cohort studies OR studies, historical cohort OR cohort studies, historical OR cohort study, historical OR historical cohort study OR study, historical cohort OR analysis, cohort OR analysis, cohort OR cohort analyses OR cohort analysis OR closed cohort studies OR cohort studies, closed OR closed cohort study OR cohort study, closed OR study, closed cohort OR studies, closed cohort OR incidence studies OR incidence study OR studies, incidence OR study, incidence OR cohort studies)) OR ("Longitudinal Studies"[Mesh] OR Longitudinal Study OR Studies, Longitudinal OR Study, Longitudinal OR Longitudinal Survey OR Longitudinal Surveys OR Survey, Longitudinal OR Surveys, Longitudinal OR Longitudinal Studies)) OR ("Follow-Up Studies"[Mesh] OR Follow Up Studies OR Follow-Up Study OR Studies, Follow-Up OR Study, Follow-Up OR Followup Studies OR Followup Study OR Studies, Followup OR Study, Followup OR Follow-Up Studies)) OR ("Prospective Studies"[Mesh] OR Prospective Study OR Studies, Prospective OR Study, Prospective OR Prospective Studies) | [4.037.621](http://www.ncbi.nlm.nih.gov/pubmed/?cmd=HistorySearch&querykey=22) |
| [**#3**](http://www.ncbi.nlm.nih.gov/pubmed/advanced) | Search ("Magnetic Resonance Imaging"[Mesh] OR Imaging, Magnetic Resonance OR NMR Imaging OR Imaging, NMR OR Zeugmatography OR Tomography, MR OR Tomography, NMR OR MR Tomography OR NMR Tomography OR Tomography, Proton Spin OR Proton Spin Tomography OR Magnetization Transfer Contrast Imaging OR MRI Scans OR MRI Scan OR Scan, MRI OR Scans, MRI OR fMRI OR MRI, Functional OR Functional MRI OR Functional MRIs OR MRIs, Functional OR Magnetic Resonance Imaging, Functional OR Imaging, Chemical Shift OR Chemical Shift Imagings OR Imagings, Chemical Shift OR Shift Imaging, Chemical OR Shift Imagings, Chemical OR Chemical Shift Imaging) OR ("Echo-Planar Imaging"[Mesh] OR Echo Planar Imaging OR Echo-Planar Imagings OR Imaging, Echo-Planar OR Imagings, Echo-Planar OR Magnetic Resonance Imaging, Echo-Planar OR Magnetic Resonance Imaging, Echo Planar OR Echoplanar Imaging OR Echoplanar Imagings OR Imaging, Echoplanar OR Imagings, Echoplanar OR Magnetic Resonance Imaging, EchoplanarEcho-Planar Magnetic Resonance ImagingEcho Planar Magnetic Resonance Imaging OR Echoplanar Magnetic Resonance Imaging OR Echo-Planar MR Tomography OR Echo Planar MR Tomography OR Echo-Planar MR Tomographies OR MR Tomographies, Echo-Planar OR Tomographies, Echo-Planar MR OR Tomography, Echo-Planar MR OR Echoplanar MR Tomography OR Echoplanar MR Tomographies OR MR Tomographies, Echoplanar OR Tomographies, Echoplanar MR OR Tomography, Echoplanar MR OR MR Tomography, Echoplanar OR MR Tomography, Echo-Planar OR MR Tomography, Echo Planar) OR ("Magnetic Resonance Spectroscopy"[Mesh] OR Magnetic Resonance Spectroscopies OR Resonance Spectroscopy, Magnetic OR Spectroscopy, Magnetic Resonance OR MR Spectroscopy OR Spectroscopy, MR OR Spectroscopy, Nuclear Magnetic Resonance OR NMR Spectroscopy OR NMR Spectroscopies OR Spectroscopies, NMR OR Spectroscopy, NMR OR Nuclear Magnetic Resonance OR Magnetic Resonance, Nuclear OR Resonance, Nuclear Magnetic OR In Vivo NMR Spectroscopy OR NMR Spectroscopy, In Vivo OR Magnetic Resonance OR Resonance, Magnetic) OR (magnetic resonance OR magnetic resonance imaging OR magnetic resonance spectroscopy OR functional magnetic resonance OR functional magnetic resonance imaging) | [476.784](http://www.ncbi.nlm.nih.gov/pubmed/?cmd=HistorySearch&querykey=21) |
| [**#2**](http://www.ncbi.nlm.nih.gov/pubmed/advanced) | Search ("Ultrasonography"[Mesh] OR Ultrasonic Imaging OR Imaging, Ultrasonic OR Imagings, Ultrasonic OR Ultrasonic Imagings OR Sonography, Medical OR Medical Sonography OR Echography OR Echotomography OR Echotomographies OR Echotomography, Computer OR Computer Echotomography OR Tomography, Ultrasonic OR Ultrasonic Tomography OR Diagnosis, Ultrasonic OR Diagnoses, Ultrasonic OR Ultrasonic Diagnoses OR Ultrasonic Diagnosis) OR ("Ultrasonography, Doppler, Color"[Mesh] OR Color Ultrasonography, Doppler OR Doppler Color Ultrasonography OR Doppler Ultrasonography, Color OR Ultrasonography, Color Doppler OR Color Doppler Ultrasonography OR Ultrasonography, Doppler Color) OR ("Ultrasonography, Doppler, Pulsed"[Mesh] OR Pulsed Doppler Ultrasonography OR Pulsed Ultrasonography, Doppler OR Doppler Ultrasonography, Pulsed OR Ultrasonography, Pulsed Doppler OR Doppler Pulsed Ultrasonography OR Ultrasonography, Doppler Pulsed) OR ("Ultrasonography, Doppler, Duplex"[Mesh] OR Duplex Doppler Ultrasonography OR Duplex Ultrasonography, Doppler OR Doppler Ultrasonography, Duplex OR Ultrasonography, Duplex Doppler OR Doppler Duplex Ultrasonography OR Ultrasonography, Doppler Duplex) OR ("Ultrasonography, Doppler"[Mesh] OR Doppler Ultrasonography OR Doppler Ultrasound Imaging OR Doppler Ultrasound Imagings OR Imaging, Doppler Ultrasound OR Imagings, Doppler Ultrasound OR Ultrasound Imaging, Doppler OR Ultrasound Imagings, Doppler) OR ((((((("Gout/ultrasonography"[Mesh]) OR "Musculoskeletal System"[Mesh]) OR "Hyperuricemia/ultrasonography"[Mesh]))) OR "Joints/ultrasonography"[Mesh]) OR "Arthritis, Gouty/ultrasonography"[Mesh]) | [1.368.427](http://www.ncbi.nlm.nih.gov/pubmed/?cmd=HistorySearch&querykey=20) |
| **#1** | Search (("Gout"[Mesh]) OR Gouts OR "Arthritis, Gouty"[Mesh] OR Gouty Arthritis OR Arthritides, Gouty OR Gouty Arthritides) OR ("Juvenile gout"[Supplementary Concept] OR Gouty nephropathy, familial juvenile OR Nephropathy, familial, with gout OR Familial juvenile hyperuricaemic nephropathy) OR (acute gout) OR (gouty) OR (gouty arthritis) OR (acute gouty arthritis) OR (tophaceous gout) OR (cronic tophaceous gout) OR (chronic tophaceous gout) OR (gout hyperuricemia) OR (gout renal) OR (hyperuricemia gout) OR (gout arthritis) OR (chronic gout) OR ("Hyperuricemia"[Mesh]) OR ("Uric Acid"[Mesh] OR Acid, Uric OR Trioxopurine OR 2,6,8-Trihydroxypurine OR Potassium Urate OR Urate, Potassium OR Urate OR Ammonium Acid Urate OR Acid Urate, Ammonium OR Urate, Ammonium Acid OR Sodium Urate Monohydrate OR Monohydrate, Sodium Urate OR Urate Monohydrate, Sodium OR Monosodium Urate Monohydrate OR Monohydrate, Monosodium Urate OR Urate Monohydrate, Monosodium OR Sodium Acid Urate Monohydrate OR Sodium Urate OR Urate, Sodium OR Monosodium Urate OR Urate, Monosodium OR Sodium Acid Urate OR Acid Urate, Sodium OR Urate, Sodium Acid) OR (intercritical gout) OR (monohydrate crystals) OR (primary gout) OR (secondary gout) | [36.222](http://www.ncbi.nlm.nih.gov/pubmed/?cmd=HistorySearch&querykey=19) |

Estrategia de búsqueda en Embase.

| **#** | **Términos de búsqueda** | **Citas** |
| --- | --- | --- |
| **#43** | #42 ([english]/lim OR [french]/lim OR [spanish]/lim) AND [humans]/lim AND [embase]/lim | 48 |
| **#42** | #8 AND #27 AND #39 | 50 |
| **#41** | #40 ([english]/lim OR [french]/lim OR [spanish]/lim) AND [humans]/lim AND [embase]/lim | 87 |
| **#40** | #8 AND #17 AND #39 | 91 |
| **#39** | #28 OR #29 OR #30 OR #31 OR #32 OR #33 OR #34 OR #35 OR #36 OR #37 OR #38 | 859.166 |
| **#38** | 'cohort analysis'/exp OR 'cohort analysis' OR 'analysis cohort'/exp OR 'analysis cohort' OR 'cohort fertility'/exp OR 'cohort fertility' OR 'cohort life cycle'/exp OR 'cohort life cycle' OR 'cohort studies'/exp OR 'cohort studies' OR 'cohort study'/exp OR 'cohort study' OR 'fertility cohort'/exp OR 'fertility cohort' AND [embase]/lim |  |
| **#37** | 'meta analysis'/exp OR 'analysis meta' OR 'meta analysis' OR metaanalysis AND [embase]/lim |  |
| **#36** | 'systematic review'/exp OR 'review systematic' AND [embase]/lim |  |
| **#35** | 'phase 4 clinical trial'/exp OR 'clinical trial phase 4' OR 'phase iv clinical study' OR 'phase iv clinical trial' AND [embase]/lim |  |
| **#34** | 'phase 3 clinical trial'/exp OR 'clinical trial phase 3' OR 'phase iii clinical study' OR 'phase iii clinical trial' AND [embase]/lim |  |
| **#33** | 'phase 2 clinical trial'/exp OR 'clinical trial phase 2' OR 'phase 2 clinical study' OR 'phase 2 study' OR 'phase 2 trial' OR 'phase ii clinical study' OR 'phase ii clinical trial' OR 'phase ii study' OR 'phase ii trial' AND [embase]/lim |  |
| **#32** | 'phase 1 clinical trial'/exp AND 'clinical trial phase 1' OR 'phase 1 clinical study' OR 'phase 1 study' OR 'phase 1 trial' OR 'phase i clinical study' OR 'phase i clinical trial' OR 'phase i study' OR 'phase i trial' AND [embase]/lim |  |
| **#31** | 'multicenter study'/exp OR 'multicenter trial' OR 'study multicenter' OR 'trial multicenter' AND [embase]/lim |  |
| **#30** | 'randomized controlled trial'/exp OR 'controlled trial randomized' OR 'randomised controlled trial' OR 'trial randomized controlled' AND [embase]/lim |  |
| **#29** | 'controlled clinical trial'/exp OR 'clinical trial controlled' AND [embase]/lim |  |
| **#28** | 'clinical trial'/exp OR 'trial clinical' AND [embase]/lim |  |
| **#27** | #18 OR #19 OR #20 OR #21 OR #22 OR #23 OR #24 OR #25 OR #26 | 682.091 |
| **#26** | 'magnetic resonance'/exp OR 'magnetic resonance imaging'/exp OR 'magnetic resonance spectroscop' OR 'functional magnetic resonance' OR 'functional magnetic resonance imaging'/exp |  |
| **#25** | 'f 19 nuclear magnetic resonance spectrometry' OR 'fluorine 19 nuclear magnetic resonance spectrometry' OR 'high field nmr' OR 'magnetic resonance spectroscopy' OR 'mnr spectroscopy' OR 'mr spectroscopy' OR 'n 15 nuclear magnetic resonance spectrometry' OR 'nmr spectral analysis' OR 'nmr spectral identification' OR 'nmr spectrometry' OR 'nmr spectroscopy' OR 'nmr spectrum' OR 'nuclear magnetic resonance spectral analysis' OR 'nuclear magnetic resonance spectrometry' OR 'nuclear magnetic resonance spectrum' OR 'p 32 nuclear magnetic resonance spectrometry' OR 'spectroscopy nuclear magnetic resonance' AND [embase]/lim |  |
| **#24** | magnetic AND resonance OR magnetic AND resonance AND imaging OR magnetic AND resonance AND spectroscopy OR functional AND magnetic AND resonance OR functional AND magnetic AND resonance AND imaging AND [embase]/lim AND [2008-2012]/py |  |
| **#23** | 'f 19 nuclear magnetic resonance spectrometry' OR 'fluorine 19 nuclear magnetic resonance spectrometry' OR 'high field nmr' OR 'magnetic resonance spectroscopy' OR 'mnr spectroscopy' OR 'mr spectroscopy' OR 'n 15 nuclear magnetic resonance spectrometry' OR 'nmr spectral analysis' OR 'nmr spectral identification' OR 'nmr spectrometry' OR 'nmr spectroscopy' OR 'nmr spectrum' OR 'nuclear magnetic resonance spectral analysis' OR 'nuclear magnetic resonance spectrometry' OR 'nuclear magnetic resonance spectrum' OR 'p 32 nuclear magnetic resonance spectrometry' OR 'spectroscopy nuclear magnetic resonance' AND [2008-2012]/py |  |
| **#22** | 'nuclear magnetic resonance spectroscopy'/exp AND [embase]/lim |  |
| **#21** | 'echo planar imaging' OR 'echo planar magnetic resonance imaging' OR 'echo planar mri' OR 'echoplanar imaging' OR 'echoplanar magnetic resonance imaging' OR 'echoplanar mri' AND [embase]/lim |  |
| **#20** | 'echo planar imaging'/exp AND [embase]/lim |  |
| **#19** | 'imaging magnetization transfer' OR 'magnetic resonance imaging' OR 'magnetic resonance imaging, cine' OR 'magnetic resonance imaging functional' OR 'magnetization transfer imaging' OR 'mr imaging' OR mri OR 'nmr imaging' AND [embase]/lim |  |
| **#18** | 'nuclear magnetic resonance imaging'/exp AND [embase]/lim |  |
| **#17** | #9 OR #10 OR #11 OR #12 OR #13 OR #14 OR #15 OR #16 |  |
| **#16** | 'doppler echo'/exp OR 'duplex doppler ultrasonography'/exp OR 'echography doppler'/exp OR 'pulsed doppler ultrasonography'/exp OR 'transcranial doppler'/exp OR 'transcranial ultrasonography'/exp OR 'ultrasonography doppler duplex'/exp OR 'ultrasonography doppler pulsed'/exp OR 'ultrasonography doppler transcranial'/exp OR 'ultrasonography transcranial doppler'/exp AND [embase]/lim |  |
| **#15** | 'doppler echo'/exp OR 'duplex doppler ultrasonography'/exp OR 'echography doppler'/exp OR 'pulsed doppler ultrasonography'/exp OR 'transcranial doppler'/exp OR 'transcranial ultrasonography'/exp OR 'ultrasonography doppler duplex'/exp OR 'ultrasonography doppler pulsed'/exp OR 'ultrasonography doppler transcranial'/exp OR 'ultrasonography transcranial doppler'/exp |  |
| **#14** | 'doppler echo' OR 'duplex doppler ultrasonography' OR 'echography doppler' OR 'pulsed doppler ultrasonography' OR 'transcranial doppler' OR 'transcranial ultrasonography' OR 'ultrasonography doppler duplex' OR 'ultrasonography doppler pulsed' OR 'ultrasonography doppler transcranial' OR 'ultrasonography transcranial doppler' AND [embase]/lim |  |
| **#13** | 'doppler echography'/exp AND [embase]/lim |  |
| **#12** | 'color doppler' OR 'color doppler flowmetry' OR 'doppler color flowmetry' OR 'doppler color ultrasound flowmetry' OR 'doppler ultrasound color flowmetry' OR 'flowmetry color ultrasound' OR 'ultrasonography doppler color' OR 'ultrasound color flowmetry' AND [embase]/lim |  |
| **#11** | 'color ultrasound flowmetry'/exp AND [embase]/lim |  |
| **#10** | doptone OR 'duplex echography' OR echogram OR echoscopy OR echosound OR 'high resolution echography' OR 'scanning ultrasonic' OR sonogram OR sonography OR 'ultrasonic detection' OR 'ultrasonic diagnosis' OR 'ultrasonic echo' OR 'ultrasonic examination' OR 'ultrasonic scanning' OR 'ultrasonic scintillation' OR ultrasonography OR 'ultrasound diagnosis' OR 'ultrasound scanning' AND [embase]/lim |  |
| **#9** | 'echography'/exp AND [embase]/lim |  |
| **#8** | #1 OR #2 OR #3 OR #4 OR #5 OR #6 OR #7 | 25.362 |
| **#7** | 'acute gout' OR gouty OR 'gouty arthritis' OR 'acute gouty arthritis' OR 'tophaceous gout' OR 'cronic tophaceous gout' OR 'chronic tophaceous gout' OR 'gout hyperuricemia' OR 'gout renal' OR 'hyperuricemia gout' OR 'gout arthritis' OR 'chronic gout' AND [embase]/lim |  |
| **#** | '2, 6, 8 trioxypurine'/exp OR 'uric acid dihydrate'/exp AND [embase]/lim |  |
| **#6** | 'uric acid'/exp AND [embase]/lim |  |
| **#5** | 'hyperuricacidemia'/exp OR 'hyperuricaemia'/exp OR 'senile hyperuricemia'/exp AND [embase]/lim |  |
| **#4** | 'hyperuricemia'/exp AND [embase]/lim |  |
| **#3** | 'juvenile gout' AND [embase]/lim |  |
| **#2** | 'gout'/exp AND [embase]/lim |  |
| **#1** | arthralgia OR arthritis AND urica OR 'arthritis gouty' OR 'gouty arthritis' OR 'gouty attack' OR 'urate inflammation' OR 'uric arthritis' AND [embase]/lim |  |

Estrategia de búsqueda en la Cochrane Library.

| **#** | **Términos de búsqueda** | **Citas** |
| --- | --- | --- |
| #1 | [MeSH descriptor Gout explode all trees](http://onlinelibrary.wiley.com/o/cochrane/searchHistory?mode=runquery&qnum=1) | 139 |
| #2 | [MeSH descriptor Arthritis, Gouty explode all trees](http://onlinelibrary.wiley.com/o/cochrane/searchHistory?mode=runquery&qnum=2) | 36 |
| #3 | [MeSH descriptor Hyperuricemia explode all trees](http://onlinelibrary.wiley.com/o/cochrane/searchHistory?mode=runquery&qnum=3) | 52 |
| #4 | [MeSH descriptor Uric Acid explode all trees](http://onlinelibrary.wiley.com/o/cochrane/searchHistory?mode=runquery&qnum=4) | 746 |
| #5 | ["tophaceous gout":ti,ab,kw](http://onlinelibrary.wiley.com/o/cochrane/searchHistory?mode=runquery&qnum=5) | 2 |
| #6 | ["Juvenile gout":ti,ab,kw](http://onlinelibrary.wiley.com/o/cochrane/searchHistory?mode=runquery&qnum=6) | 0 |
| #7 | [(acute gout) OR (gouty) OR (gouty arthritis) OR (acute gouty arthritis) OR (tophaceous gout) OR (cronic tophaceous gout) OR (chronic tophaceous gout) OR (gout hyperuricemia) OR (gout renal) OR (hyperuricemia gout) OR (gout arthritis) OR (chronic gout) :ti,ab,kw](http://onlinelibrary.wiley.com/o/cochrane/searchHistory?mode=runquery&qnum=7) | 193 |
| #8 | [(#1 OR #2 OR #3 OR #4 OR #5 OR #6 OR #7)](http://onlinelibrary.wiley.com/o/cochrane/searchHistory?mode=runquery&qnum=8) | 903 |
| #9 | [MeSH descriptor Reproducibility of Results explode all trees](http://onlinelibrary.wiley.com/o/cochrane/searchHistory?mode=runquery&qnum=9) | 7.905 |
| #10 | [(Reproducibility of Results):ti,ab,kw](http://onlinelibrary.wiley.com/o/cochrane/searchHistory?mode=runquery&qnum=10) | 8.629 |
| #11 | [MeSH descriptor Feasibility Studies explode all trees](http://onlinelibrary.wiley.com/o/cochrane/searchHistory?mode=runquery&qnum=11) | 2.531 |
| #12 | [(Feasibility Studies):ti,ab,kw](http://onlinelibrary.wiley.com/o/cochrane/searchHistory?mode=runquery&qnum=12) | 5.068 |
| #13 | [MeSH descriptor Validation Studies as Topic explode all trees](http://onlinelibrary.wiley.com/o/cochrane/searchHistory?mode=runquery&qnum=13) | 18 |
| #14 | [(construct validity) OR (validation studies) OR (validation study) OR (validity reliability) OR (reliability validity) OR (validity) OR (validated) OR (validated study) OR (validated studies) OR (applicability) OR (clinimetric properties)](http://onlinelibrary.wiley.com/o/cochrane/searchHistory?mode=runquery&qnum=14) | 3.5395 |
| #15 | [MeSH descriptor Psychometrics explode all trees](http://onlinelibrary.wiley.com/o/cochrane/searchHistory?mode=runquery&qnum=15) | 2.017 |
| #16 | [MeSH descriptor Sensitivity and Specificity explode all trees](http://onlinelibrary.wiley.com/o/cochrane/searchHistory?mode=runquery&qnum=16) | 13.224 |
| #17 | [MeSH descriptor Limit of Detection explode all trees](http://onlinelibrary.wiley.com/o/cochrane/searchHistory?mode=runquery&qnum=17) | 6 |
| #18 | [MeSH descriptor ROC Curve explode all trees](http://onlinelibrary.wiley.com/o/cochrane/searchHistory?mode=runquery&qnum=18) | 798 |
| #19 | [MeSH descriptor Predictive Value of Tests explode all trees](http://onlinelibrary.wiley.com/o/cochrane/searchHistory?mode=runquery&qnum=19) | 4.861 |
| #20 | [MeSH descriptor False Negative Reactions explode all trees](http://onlinelibrary.wiley.com/o/cochrane/searchHistory?mode=runquery&qnum=20) | 304 |
| #21 | [MeSH descriptor False Positive Reactions explode all trees](http://onlinelibrary.wiley.com/o/cochrane/searchHistory?mode=runquery&qnum=21) | 449 |
| #22 | [MeSH descriptor Likelihood Functions explode all trees](http://onlinelibrary.wiley.com/o/cochrane/searchHistory?mode=runquery&qnum=22) | 305 |
| #23 | [MeSH descriptor Evaluation Studies as Topic explode all trees](http://onlinelibrary.wiley.com/o/cochrane/searchHistory?mode=runquery&qnum=23) | 79.426 |
| #24 | [(#9 OR #10 OR #11 OR #12 OR #13 OR #14 OR #15 OR #16 OR #17 OR #18 OR #19 OR #20 OR #21 OR #22 OR #23)](http://onlinelibrary.wiley.com/o/cochrane/searchHistory?mode=runquery&qnum=24) | 114.784 |
| #25 | [MeSH descriptor Ultrasonography explode all trees](http://onlinelibrary.wiley.com/o/cochrane/searchHistory?mode=runquery&qnum=25) | 6.514 |
| #26 | [(Ultrasonography):ti,ab,kw](http://onlinelibrary.wiley.com/o/cochrane/searchHistory?mode=runquery&qnum=26) | 8.922 |
| #27 | [MeSH descriptor Ultrasonography, Doppler, Color explode all trees](http://onlinelibrary.wiley.com/o/cochrane/searchHistory?mode=runquery&qnum=27) | 459 |
| #28 | [(Ultrasonography, Doppler, Color):ti,ab,kw](http://onlinelibrary.wiley.com/o/cochrane/searchHistory?mode=runquery&qnum=28) | 15.322 |
| #29 | [MeSH descriptor Ultrasonography, Doppler, Pulsed explode all trees](http://onlinelibrary.wiley.com/o/cochrane/searchHistory?mode=runquery&qnum=29) | 120 |
| #30 | [(Ultrasonography, Doppler, Pulsed):ti,ab,kw](http://onlinelibrary.wiley.com/o/cochrane/searchHistory?mode=runquery&qnum=30) | 20.284 |
| #31 | [MeSH descriptor Ultrasonography, Doppler, Duplex explode all trees](http://onlinelibrary.wiley.com/o/cochrane/searchHistory?mode=runquery&qnum=31) | 710 |
| #32 | [(Ultrasonography, Doppler, Duplex):ti,ab,kw](http://onlinelibrary.wiley.com/o/cochrane/searchHistory?mode=runquery&qnum=32) | 12.112 |
| #33 | [MeSH descriptor Ultrasonography, Doppler explode all trees](http://onlinelibrary.wiley.com/o/cochrane/searchHistory?mode=runquery&qnum=33) | 2214 |
| #34 | [(Ultrasonography, Doppler):ti,ab,kw](http://onlinelibrary.wiley.com/o/cochrane/searchHistory?mode=runquery&qnum=34) | 11.845 |
| #35 | [MeSH descriptor Magnetic Resonance Imaging explode all trees](http://onlinelibrary.wiley.com/o/cochrane/searchHistory?mode=runquery&qnum=35) | 4.286 |
| #36 | [(Magnetic Resonance Imaging):ti,ab,kw](http://onlinelibrary.wiley.com/o/cochrane/searchHistory?mode=runquery&qnum=36) | 5.305 |
| #37 | [MeSH descriptor Echo-Planar Imaging explode all trees](http://onlinelibrary.wiley.com/o/cochrane/searchHistory?mode=runquery&qnum=37) | 66 |
| #38 | [(Echo-Planar Imaging):ti,ab,kw](http://onlinelibrary.wiley.com/o/cochrane/searchHistory?mode=runquery&qnum=38) | 97 |
| #39 | [MeSH descriptor Magnetic Resonance Spectroscopy explode all trees](http://onlinelibrary.wiley.com/o/cochrane/searchHistory?mode=runquery&qnum=39) | 415 |
| #40 | [(Magnetic Resonance Spectroscopy):ti,ab,kw](http://onlinelibrary.wiley.com/o/cochrane/searchHistory?mode=runquery&qnum=40) | 558 |
| #41 | [magnetic resonance OR magnetic resonance imaging OR magnetic resonance spectroscopy OR functional magnetic resonance OR functional magnetic resonance imaging](http://onlinelibrary.wiley.com/o/cochrane/searchHistory?mode=runquery&qnum=41) | 6.650 |
| #42 | [(#25 OR #26 OR #27 OR #28 OR #29 OR #30 OR #31 OR #32 OR #33 OR #34 OR #35 OR #36 OR #37 OR #38 OR #39 OR #40 OR #41)](http://onlinelibrary.wiley.com/o/cochrane/searchHistory?mode=runquery&qnum=42) | 31.178 |
| #43 | [8# AND 24# AND 42#](http://onlinelibrary.wiley.com/o/cochrane/searchHistory?mode=runquery&qnum=43) | 9 |
